# Supplementary material for: CpG Sites Associated with Cigarette Smoking: Analysis of Epigenome-Wide Data from the Sister Study
Source: PubMed Central journal article supplement (PMC4080519; doi:10.1289/ehp.1307480), 2014-04-04
Supplement: ehp.1307480.s001.pdf [file ehp.1307480.s001.pdf]

## Supplemental Material

# **CpG Sites Associated with Cigarette Smoking: Analysis of Epigenome-Wide Data from the Sister Study**

Sophia Harlid, Zongli Xu, Vijayalakshmi Panduri, Dale P. Sandler, and Jack A. Taylor

| <b>Table of Contents</b>                                                                                                                           | <b>Page</b> |
|----------------------------------------------------------------------------------------------------------------------------------------------------|-------------|
| <b>Smoking Variable</b>                                                                                                                            | 2           |
| <b>Table S1.</b> Pyrosequencing primers.                                                                                                           | 3           |
| <b>Table S2.</b> Result of regression analysis comparing methylation values of never-smokers to former or current smokers for selected CpG probes. | 4           |
| <b>Table S3.</b> Association between DNA methylation and smoking for the eight CpGs originally identified in the 27K dataset.                      | 5           |
| <b>Table S4.</b> Replication of the association analysis in the 612 breast cancer free (non-Case) women that were part of 27K dataset.             | 6           |
| <b>Table S5.</b> Effects of years smoked, time since quit and interactions between the two factors on methylation changes.                         | 7           |
| <b>Table S6.</b> Effects of pack-years, time since quit and interactions between the two factors on methylation changes.                           | 8           |
| <b>Table S7.</b> Replication of previously published results.                                                                                      | 9           |
| <b>Figure S1.</b> Replication of cg02657160 ( <i>CPOX</i> ) using pyrosequencing.                                                                  | 19          |
| <b>References</b>                                                                                                                                  | 20          |

## **Smoking Variable**

The smoking classification variable ('never', 'former', and 'current smokers') is based on three raw questionnaire variables:

**SM1:** Have you ever smoked at least one cigarette per day for six months or longer

**SM2:** Have you ever smoked at least one cigarette per month for one year or longer

**SM4.** Have you smoked at least one cigarette per day, on average, over the past 12 months

Women who answered yes to both SM1 and SM4 were classified as current smokers and women who answered yes to SM1 and no to SM4 were classified as former smokers. Women who answered no to both SM1 and SM2 were classified as never smokers. Detailed information was collected by decade of life on smoking dose, duration, and periods of quitting for all current and former smokers, and used to construct estimates of duration, pack-years, and time since quitting.

Information on obtaining questionnaires is available through the Sister Study website:

<http://sisterstudy.niehs.nih.gov> (NIEHS, 2014).

**Table S1.** Pyrosequencing primers.

| <b>Primer</b>                     | <b>Sequence</b>                            |
|-----------------------------------|--------------------------------------------|
| YAP1 cg15999356 Forward Primer    | 5'-GTATTGTATAAAGGGAGGTTTTAAAGAG-3'         |
| YAP1 cg15999356 Reverse Primer    | 5'-Biotin-ACAATATCCCTTTCATAACTTATAATTCT-3' |
| YAP1 cg15999356 Sequencing Primer | 5'-GGGAGGTTnTTAAAGAGT-3'                   |
| CPOX cg02657160 Forward Primer    | 5'-GGTTTAGTGGTTTTTGTTTGAAAATATAAG-3'       |
| CPOX cg02657160 Reverse Primer    | 5'-Biotin-AACCCCACATCTTAAATAAAAACTT-3'     |
| CPOX cg02657160 Sequencing Primer | 5'-GTTAGTATTATAGTTTAAAATTTGT-3'            |

**Table S2.** Result of regression analysis comparing methylation values of never-smokers to former or current smokers for selected CpG probes.

| <b>CpG</b> | <b>Symbol</b> | <b>Former smoker:<br/>Coefficient</b> | <b>Former smoker:<br/>P</b> | <b>Current smoker:<br/>Coefficient</b> | <b>Current smoker:<br/>P</b> |
|------------|---------------|---------------------------------------|-----------------------------|----------------------------------------|------------------------------|
| cg03636183 | F2RL3         | -1.723E-02                            | 2.255E-18                   | -7.021E-02                             | 3.833E-67                    |
| cg19859270 | GPR15         | -6.769E-03                            | 5.622E-14                   | -2.631E-02                             | 1.245E-51                    |
| cg09837977 | LRRN3         | -7.818E-03                            | 5.672E-09                   | -1.668E-02                             | 2.966E-11                    |
| cg26764244 | GNG12         | -1.020E-02                            | 1.725E-06                   | -2.105E-02                             | 1.013E-07                    |
| cg16254309 | CNTNAP2       | -3.161E-03                            | 5.173E-04                   | -1.017E-02                             | 2.519E-09                    |
| cg13500388 | CBFB          | -5.248E-03                            | 6.547E-03                   | -1.925E-02                             | 8.435E-08                    |
| cg11314684 | AKT3          | -4.128E-03                            | 3.540E-02                   | -2.000E-02                             | 4.530E-08                    |
| cg23667432 | ALPP          | -2.187E-03                            | 1.293E-01                   | -1.412E-02                             | 1.484E-07                    |
| cg13668129 | HNRPUL1       | -1.617E-03                            | 1.323E-01                   | -1.017E-02                             | 3.879E-07                    |
| cg18660898 | MLLT11        | -2.410E-04                            | 7.731E-01                   | -7.471E-03                             | 1.393E-06                    |
| cg25426302 | PRRT1         | -9.345E-04                            | 4.318E-01                   | -1.088E-02                             | 1.128E-06                    |
| cg15344028 | ICOS          | -2.382E-03                            | 3.878E-01                   | -2.481E-02                             | 1.187E-06                    |
| cg22335340 | PTPN6         | -2.949E-03                            | 4.370E-02                   | -1.220E-02                             | 8.549E-06                    |
| cg10084993 | SLC9A3R2      | -5.401E-03                            | 1.142E-02                   | -1.684E-02                             | 1.872E-05                    |
| cg22471346 | GAS7          | -2.944E-04                            | 3.037E-01                   | 2.177E-03                              | 3.865E-05                    |
| cg21474838 | KLRD1         | 5.509E-03                             | 2.597E-04                   | 9.583E-03                              | 5.464E-04                    |
| cg25809905 | ITGA2B        | 2.515E-03                             | 4.982E-01                   | 3.124E-02                              | 6.153E-06                    |
| cg13185177 | GP5           | 8.017E-03                             | 5.762E-03                   | 2.201E-02                              | 3.949E-05                    |

**Table S3.** Association between DNA methylation and smoking for the eight CpGs originally identified in the 27K dataset. Results are presented both with and without adjustments, as well as the association with passive smoking.

| <b>CpG</b> | <b>Gene</b>    | <b>Active smoking:<br/>P</b> | <b>Active<br/>smoking:<br/>FDR</b> | <b>Active<br/>smoking:<br/>P<sup>a</sup></b> | <b>Active<br/>smoking:<br/>FDR<sup>a</sup></b> | <b>Association<br/>with<br/>passive smoking</b> |
|------------|----------------|------------------------------|------------------------------------|----------------------------------------------|------------------------------------------------|-------------------------------------------------|
| cg03636183 | <i>F2RL3</i>   | 9.28E-70                     | 1.89E-65                           | 4.70E-59                                     | 9.74E-55                                       | 6.99E-01                                        |
| cg19859270 | <i>GPR15</i>   | 2.93E-53                     | 2.99E-49                           | 1.37E-41                                     | 1.42E-37                                       | 9.57E-01                                        |
| cg09837977 | <i>LRRN3</i>   | 1.71E-14                     | 1.16E-10                           | 1.61E-11                                     | 1.11E-07                                       | 6.68E-01                                        |
| cg26764244 | <i>GNG12</i>   | 9.03E-10                     | 4.60E-06                           | 3.19E-07                                     | 1.65E-03                                       | 7.63E-01                                        |
| cg16254309 | <i>CNTNAP2</i> | 1.88E-09                     | 7.69E-06                           | 1.44E-06                                     | 4.97E-03                                       | 5.11E-01                                        |
| cg13500388 | <i>CBFB</i>    | 1.77E-07                     | 6.00E-04                           | 1.56E-05                                     | 2.94E-02                                       | 5.69E-01                                        |
| cg11314684 | <i>AKT3</i>    | 2.14E-07                     | 6.23E-04                           | 1.13E-06                                     | 4.67E-03                                       | 5.09E-01                                        |
| cg22335340 | <i>PTPN6</i>   | 2.86E-05                     | 3.99E-02                           | 1.73E-04                                     | 1.80E-01                                       | 9.47E-01                                        |

<sup>a</sup>Adjusted for passive smoking, maternal smoking, parity, and menopause status.

**Table S4.** Replication of the association analysis in the 612 breast cancer free (non-Case) women that were part of 27K dataset. When we repeated the analysis in non-Case women six of the eight probes from the primary analysis remained significant under the same criteria. Two probes failed to reach significance but these two (cg13500388 in *CBFB* and cg11314684 in *AKT3*) have been independently identified by Sun et al. 2013 making it likely that the negative results are caused by the small sample size.

| <b>CpG</b> | <b>Gene</b>    | <b>Cases+nonCases<br/>(n=908):P</b> | <b>Cases+nonCases<br/>(n=908):FDR</b> | <b>nonCases only<br/>(n=612):P</b> | <b>nonCases only<br/>(n=612):FDR</b> |
|------------|----------------|-------------------------------------|---------------------------------------|------------------------------------|--------------------------------------|
| cg03636183 | <i>F2RL3</i>   | 9.3E-70                             | 1.9E-65                               | 4.5E-53                            | 1.2E-48                              |
| cg19859270 | <i>GPR15</i>   | 2.9E-53                             | 3.0E-49                               | 2.6E-33                            | 3.4E-29                              |
| cg09837977 | <i>LRRN3</i>   | 1.7E-14                             | 1.2E-10                               | 1.6E-08                            | 1.4E-04                              |
| cg26764244 | <i>GNG12</i>   | 9.0E-10                             | 4.6E-06                               | 8.1E-08                            | 3.5E-04                              |
| cg16254309 | <i>CNTNAP2</i> | 1.9E-09                             | 7.7E-06                               | 7.9E-08                            | 3.5E-04                              |
| cg13500388 | <i>CBFB</i>    | 1.8E-07                             | 6.0E-04                               | 6.7E-04                            | 2.6E-01                              |
| cg11314684 | <i>AKT3</i>    | 2.1E-07                             | 6.2E-04                               | 5.2E-04                            | 2.6E-01                              |
| cg22335340 | <i>PTPN6</i>   | 2.9E-05                             | 4.0E-02                               | 2.7E-08                            | 1.7E-04                              |

**Table S5.** Effects of years smoked, time since quit and interactions between the two factors on methylation changes. Statistical tests were done separately in current smokers and former smokers using a multiple linear regression model adjusting for age at blood draw.

| CpG            | Gene           | Current smoker, Years smoked: Coef. | Current smoker, Years smoked: P | Former smoker, Years smoked: Coef. | Former smoker, Years smoked: P | Former smoker, Time since quit: Coef. | Former smoker, Time since quit: P | Interaction P value |
|----------------|----------------|-------------------------------------|---------------------------------|------------------------------------|--------------------------------|---------------------------------------|-----------------------------------|---------------------|
| 27K dataset    |                |                                     |                                 |                                    |                                |                                       |                                   |                     |
| cg03636183     | <i>F2RL3</i>   | -2.77E-03                           | 1.71E-02*                       | -1.61E-03                          | 2.54E-17*                      | 1.49E-03                              | 9.87E-16*                         | 2.73E-04*           |
| cg19859270     | <i>GPR15</i>   | -1.01E-03                           | 1.82E-02*                       | -6.19E-04                          | 1.89E-16*                      | 5.34E-04                              | 6.31E-13*                         | 1.98E-02*           |
| cg09837977     | <i>LRRN3</i>   | -8.47E-04                           | 3.45E-01                        | -8.20E-04                          | 1.70E-05*                      | 5.96E-04                              | 1.42E-03*                         | 8.76E-01            |
| cg26764244     | <i>GNG12</i>   | -1.14E-03                           | 1.12E-01                        | -3.57E-04                          | 3.74E-02*                      | 2.33E-04                              | 1.63E-01                          | 1.24E-01            |
| cg16254309     | <i>CNTNAP2</i> | 4.52E-04                            | 2.77E-01                        | -3.55E-04                          | 3.37E-04*                      | 2.56E-04                              | 8.18E-03*                         | 8.20E-01            |
| cg13500388     | <i>CBFB</i>    | 4.57E-04                            | 5.12E-01                        | -5.52E-04                          | 2.80E-03*                      | 4.03E-04                              | 2.53E-02*                         | 3.12E-01            |
| cg11314684     | <i>AKT3</i>    | -6.84E-05                           | 9.19E-01                        | -6.53E-04                          | 3.82E-04*                      | 6.59E-04                              | 2.32E-04*                         | 6.48E-01            |
| cg22335340     | <i>PTPN6</i>   | -6.07E-04                           | 1.99E-01                        | -1.68E-04                          | 2.90E-01                       | 2.02E-04                              | 1.93E-01                          | 2.91E-03*           |
| 450K dataset   |                |                                     |                                 |                                    |                                |                                       |                                   |                     |
| cg02657160     | <i>CPOX</i>    | -7.28E-04                           | 2.18E-01                        | -1.19E-04                          | 5.15E-01                       | 2.51E-04                              | 1.86E-01                          | 5.32E-01            |
| cg15999356     | <i>YAP1</i>    | -1.96E-03                           | 5.23E-01                        | 8.53E-04                           | 2.74E-01                       | -1.17E-04                             | 8.87E-01                          | 7.87E-01            |
| cg05575921     | <i>AHRR</i>    | -5.19E-03                           | 2.66E-01                        | -2.58E-03                          | 3.25E-06*                      | 2.20E-03                              | 2.47E-04*                         | 6.62E-02            |
| cg06644428     | <i>2q37.1</i>  | -4.50E-04                           | 4.48E-01                        | -1.38E-03                          | 1.44E-03*                      | 1.44E-03                              | 1.43E-03*                         | 4.41E-01            |
| cg05951221     | <i>2q37.1</i>  | -3.49E-03                           | 2.06E-01                        | -3.10E-03                          | 6.69E-05*                      | 3.22E-03                              | 7.38E-05*                         | 7.39E-01            |
| Pyrosequencing |                |                                     |                                 |                                    |                                |                                       |                                   |                     |
| cg02657160     | <i>CPOX</i>    | -6.12E-02                           | 1.14E-01                        | -5.00E-02                          | 2.43E-03*                      | 5.45E-02                              | 4.31E-04*                         | 9.87E-01            |
| cg15999356     | <i>YAP1</i>    | 2.10E-01                            | 1.88E-01                        | -7.90E-02                          | 2.43E-01                       | 9.06E-02                              | 1.60E-01                          | 2.49E-01            |

\*p<0.05.

**Table S6.** Effects of pack-years, time since quit and interactions between the two factors on methylation changes. Statistical tests were done separately in current smokers and former smokers using a multiple linear regression model adjusting for age at blood draw.

| CpG            | Gene           | Current smoker,<br>Pack-year:<br>Coef. | Current<br>smoker,<br>Pack-year:<br>P | Former smoker,<br>Pack-year:<br>Coef. | Former<br>smoker,<br>Pack-year:<br>P | Former<br>smoker,<br>Time since<br>quit:<br>Coef. | Former<br>smoker,<br>Time since<br>quit:<br>P | Interaction<br>P value |
|----------------|----------------|----------------------------------------|---------------------------------------|---------------------------------------|--------------------------------------|---------------------------------------------------|-----------------------------------------------|------------------------|
| 27K dataset    |                |                                        |                                       |                                       |                                      |                                                   |                                               |                        |
| cg03636183     | <i>F2RL3</i>   | -6.63E-04                              | 3.14E-01                              | -9.07E-04                             | 3.04E-10*                            | 1.49E-03                                          | 9.87E-16*                                     | 2.56E-04*              |
| cg19859270     | <i>GPR15</i>   | -2.07E-04                              | 3.38E-01                              | -4.10E-04                             | 3.77E-13*                            | 5.34E-04                                          | 6.31E-13*                                     | 6.56E-02               |
| cg09837977     | <i>LRRN3</i>   | -3.70E-04                              | 4.24E-01                              | -5.06E-04                             | 4.10E-04*                            | 5.96E-04                                          | 1.42E-03*                                     | 8.54E-01               |
| cg26764244     | <i>GNG12</i>   | -1.09E-04                              | 7.70E-01                              | -2.45E-04                             | 5.48E-02                             | 2.33E-04                                          | 1.63E-01                                      | 3.94E-01               |
| cg16254309     | <i>CNTNAP2</i> | 1.24E-04                               | 5.57E-01                              | -2.41E-04                             | 9.61E-04*                            | 2.56E-04                                          | 8.18E-03*                                     | 8.35E-01               |
| cg13500388     | <i>CBFB</i>    | 1.79E-04                               | 6.04E-01                              | -3.30E-04                             | 1.58E-02*                            | 4.03E-04                                          | 2.53E-02*                                     | 4.09E-01               |
| cg11314684     | <i>AKT3</i>    | -1.17E-04                              | 7.36E-01                              | -2.70E-04                             | 4.83E-02*                            | 6.59E-04                                          | 2.32E-04*                                     | 8.08E-01               |
| cg22335340     | <i>PTPN6</i>   | -2.76E-04                              | 2.65E-01                              | -1.46E-04                             | 2.13E-01                             | 2.02E-04                                          | 1.93E-01                                      | 6.86E-02               |
| 450K dataset   |                |                                        |                                       |                                       |                                      |                                                   |                                               |                        |
| cg02657160     | <i>CPOX</i>    | -3.67E-04                              | 1.47E-01                              | -1.94E-04                             | 1.91E-01                             | 2.51E-04                                          | 1.86E-01                                      | 5.25E-01               |
| cg15999356     | <i>YAPI</i>    | -1.24E-03                              | 3.42E-01                              | 6.19E-04                              | 3.28E-01                             | -1.17E-04                                         | 8.87E-01                                      | 4.04E-01               |
| cg05575921     | <i>AHRR</i>    | -2.81E-03                              | 4.47E-01                              | -2.18E-03                             | 7.36E-07*                            | 2.20E-03                                          | 2.47E-04*                                     | 3.67E-02*              |
| cg06644428     | <i>2q37.1</i>  | 1.36E-04                               | 5.98E-01                              | -8.92E-04                             | 1.15E-02*                            | 1.44E-03                                          | 1.43E-03*                                     | 3.94E-01               |
| cg05951221     | <i>2q37.1</i>  | -1.86E-04                              | 8.76E-01                              | -2.54E-03                             | 5.93E-05*                            | 3.22E-03                                          | 7.38E-05*                                     | 4.17E-01               |
| Pyrosequencing |                |                                        |                                       |                                       |                                      |                                                   |                                               |                        |
| cg02657160     | <i>CPOX</i>    | 5.17E-03                               | 7.98E-01                              | -3.64E-02                             | 1.64E-04*                            | 5.45E-02                                          | 4.31E-04*                                     | 9.26E-01               |
| cg15999356     | <i>YAPI</i>    | 8.89E-02                               | 2.68E-01                              | -9.83E-02                             | 1.52E-02                             | 9.06E-02                                          | 1.60E-01                                      | 2.83E-01               |

\*p<0.05.



**Table S7.** Replication of previously published results. All CpGs in this list have been reported to be associated with smoking status in at least one study. CpGs are listed based on number of studies that have reported an association for that CpG.

| CpG        | CHR | Gene            | 27K: P          | 450K: P  | Source <sup>a</sup>                                                              |
|------------|-----|-----------------|-----------------|----------|----------------------------------------------------------------------------------|
| cg19859270 | 3   | <i>GPR15</i>    | 2.93E-53        | 3.78E-04 | (Breitling et al. 2011; Sun et al. 2013; Wan et al. 2012; Zeilinger et al. 2013) |
| cg03636183 | 19  | <i>F2RL3</i>    | 9.28E-70        | 1.97E-07 | (Breitling et al. 2011; Sun et al. 2013; Wan et al. 2012; Zeilinger et al. 2013) |
| cg06644428 | 2   | <i>2q37</i>     | NA <sup>b</sup> | 2.56E-07 | (Sun et al. 2013; Zeilinger et al. 2013; Shenker et al. 2013)                    |
| cg05951221 | 2   | <i>2q37</i>     | NA <sup>b</sup> | 7.06E-07 | (Sun et al. 2013; Zeilinger et al. 2013; Shenker et al. 2013)                    |
| cg21566642 | 2   | <i>2q37</i>     | NA <sup>b</sup> | 2.98E-06 | (Sun et al. 2013; Zeilinger et al. 2013; Shenker et al. 2013)                    |
| cg01940273 | 2   | <i>2q37</i>     | NA <sup>b</sup> | 8.06E-04 | (Sun et al. 2013; Zeilinger et al. 2013; Shenker et al. 2013)                    |
| cg23576855 | 5   | <i>AHRR</i>     | NA <sup>b</sup> | 0.02     | (Sun et al. 2013; Zeilinger et al. 2013; Shenker et al. 2013)                    |
| cg05575921 | 5   | <i>AHRR</i>     | NA <sup>b</sup> | 2.60E-07 | (Sun et al. 2013; Zeilinger et al. 2013; Shenker et al. 2013)                    |
| cg21161138 | 5   | <i>AHRR</i>     | NA <sup>b</sup> | 4.55E-03 | (Sun et al. 2013; Zeilinger et al. 2013; Shenker et al. 2013)                    |
| cg06126421 | 6   | <i>6p21</i>     | NA <sup>b</sup> | 6.70E-06 | (Sun et al. 2013; Zeilinger et al. 2013; Shenker et al. 2013)                    |
| cg15258980 | 2   | <i>ARHGAP25</i> | 0.09            | 0.75     | (Sun et al. 2013; Wan et al. 2012)                                               |
| cg05445326 | 3   | <i>TM4SF19</i>  | 0.4             | 0.49     | (Sun et al. 2013; Wan et al. 2012)                                               |
| cg16254309 | 7   | <i>CNTNAP2</i>  | 1.88E-09        | 0.01     | (Sun et al. 2013; Wan et al. 2012)                                               |
| cg09837977 | 7   | <i>LRRN3</i>    | 1.71E-14        | 5.02E-04 | (Sun et al. 2013; Wan et al. 2012)                                               |
| cg09084200 | 11  | <i>NCAPD3</i>   | 6.97E-03        | 0.03     | (Sun et al. 2013; Wan et al. 2012)                                               |

| <b>CpG</b> | <b>CHR</b> | <b>Gene</b>      | <b>27K: P</b>   | <b>450K: P</b> | <b>Source<sup>a</sup></b>          |
|------------|------------|------------------|-----------------|----------------|------------------------------------|
| cg15691199 | 14         | <i>CEBPE</i>     | 1.20E-04        | 0.03           | (Sun et al. 2013; Wan et al. 2012) |
| cg21917349 | 15         | <i>APBA2</i>     | 0.11            | 0.89           | (Sun et al. 2013; Wan et al. 2012) |
| cg01500140 | 19         | <i>LIM2</i>      | 5.26E-04        | 0.01           | (Sun et al. 2013; Wan et al. 2012) |
| cg10161121 | 1          | <i>FASLG</i>     | 0.84            | 0.74           | (Wan et al. 2012)                  |
| cg18881723 | 1          | <i>SLAMF1</i>    | 0.04            | 0.23           | (Wan et al. 2012)                  |
| cg13247990 | 3          | <i>MYLK</i>      | 0.41            | 0.34           | (Wan et al. 2012)                  |
| cg24262469 | 3          | <i>TIPARP</i>    | 0.03            | 0.81           | (Wan et al. 2012)                  |
| cg02564523 | 7          | <i>ORA12</i>     | 2.95E-03        | 0.29           | (Wan et al. 2012)                  |
| cg01988129 | 8          | <i>ADHFE1</i>    | 5.41E-03        | 0.42           | (Wan et al. 2012)                  |
| cg12044210 | 15         | <i>APBA2</i>     | NA <sup>b</sup> | 0.45           | (Wan et al. 2012)                  |
| cg09155905 | 17         | <i>FNDC8</i>     | 0.08            | 0.88           | (Wan et al. 2012)                  |
| cg11314684 | 1          | <i>AKT3</i>      | 2.14E-07        | 9.31E-04       | (Sun et al. 2013)                  |
| cg04983977 | 1          | <i>GPR25</i>     | 0.24            | 0.57           | (Sun et al. 2013)                  |
| cg17791651 | 1          | <i>POU3F1</i>    | NA <sup>b</sup> | 0.25           | (Sun et al. 2013)                  |
| cg03330058 | 3          | <i>ABTB1</i>     | 0.18            | 0.49           | (Sun et al. 2013)                  |
| cg13745870 | 3          | <i>SPATA12</i>   | NA <sup>b</sup> | 0.81           | (Sun et al. 2013)                  |
| cg03340878 | 6          | <i>OR2B6</i>     | 0.000165        | 0.81           | (Sun et al. 2013)                  |
| cg14223444 | 9          | <i>NCBP1</i>     | 0.05            | 0.59           | (Sun et al. 2013)                  |
| cg13633560 | 11         | <i>LRRC32</i>    | 0.02            | 0.07           | (Sun et al. 2013)                  |
| cg00353953 | 12         | <i>ZNF384</i>    | 0.01            | 0.47           | (Sun et al. 2013)                  |
| cg26259865 | 16         | <i>LOC124220</i> | 0.02            | 0.09           | (Sun et al. 2013)                  |
| cg13668129 | 19         | <i>HNRPUL1</i>   | 2.36E-06        | 0.3            | (Sun et al. 2013)                  |
| cg12547807 | 1          | NA <sup>c</sup>  | NA <sup>b</sup> | 5.15E-03       | (Zeilinger et al. 2013)            |

| <b>CpG</b> | <b>CHR</b> | <b>Gene</b>     | <b>27K: P</b>   | <b>450K: P</b> | <b>Source<sup>a</sup></b> |
|------------|------------|-----------------|-----------------|----------------|---------------------------|
| cg04885881 | 1          | NA <sup>c</sup> | NA <sup>b</sup> | 0.04           | (Zeilinger et al. 2013)   |
| cg21393163 | 1          | NA <sup>c</sup> | NA <sup>b</sup> | 4.62E-03       | (Zeilinger et al. 2013)   |
| cg27537125 | 1          | NA <sup>c</sup> | NA <sup>b</sup> | 6.57E-03       | (Zeilinger et al. 2013)   |
| cg23090529 | 1          | NA <sup>c</sup> | NA <sup>b</sup> | 0.81           | (Zeilinger et al. 2013)   |
| cg21140898 | 1          | NA <sup>c</sup> | NA <sup>b</sup> | 0.4            | (Zeilinger et al. 2013)   |
| cg03547355 | 1          | NA <sup>c</sup> | NA <sup>b</sup> | 8.77E-04       | (Zeilinger et al. 2013)   |
| cg17819085 | 1          | NA <sup>c</sup> | NA <sup>b</sup> | 5.04E-03       | (Zeilinger et al. 2013)   |
| cg08709672 | 1          | <i>AVPR1B</i>   | NA <sup>b</sup> | 0.01           | (Zeilinger et al. 2013)   |
| cg20295214 | 1          | <i>AVPR1B</i>   | NA <sup>b</sup> | 3.65E-03       | (Zeilinger et al. 2013)   |
| cg19713429 | 1          | <i>CAPZB</i>    | NA <sup>b</sup> | 0.16           | (Zeilinger et al. 2013)   |
| cg09662411 | 1          | <i>GFII</i>     | NA <sup>b</sup> | 0.1            | (Zeilinger et al. 2013)   |
| cg18146737 | 1          | <i>GFII</i>     | NA <sup>b</sup> | 0.02           | (Zeilinger et al. 2013)   |
| cg12876356 | 1          | <i>GFII</i>     | NA <sup>b</sup> | 0.01           | (Zeilinger et al. 2013)   |
| cg18316974 | 1          | <i>GFII</i>     | NA <sup>b</sup> | 0.01           | (Zeilinger et al. 2013)   |
| cg09935388 | 1          | <i>GFII</i>     | NA <sup>b</sup> | 0.01           | (Zeilinger et al. 2013)   |
| cg25189904 | 1          | <i>GNG12</i>    | NA <sup>b</sup> | 2.94E-06       | (Zeilinger et al. 2013)   |
| cg15542713 | 1          | <i>HIVEP3</i>   | NA <sup>b</sup> | 0.02           | (Zeilinger et al. 2013)   |
| cg24049493 | 1          | <i>HIVEP3</i>   | NA <sup>b</sup> | 5.20E-04       | (Zeilinger et al. 2013)   |
| cg11231349 | 1          | <i>NOS1AP</i>   | NA <sup>b</sup> | 0.13           | (Zeilinger et al. 2013)   |
| cg19406367 | 1          | <i>SGIP1</i>    | NA <sup>b</sup> | 0.09           | (Zeilinger et al. 2013)   |
| cg09469355 | 1          | <i>SKI</i>      | NA <sup>b</sup> | 8.77E-03       | (Zeilinger et al. 2013)   |
| cg08884752 | 1          | <i>SKI</i>      | NA <sup>b</sup> | 0.02           | (Zeilinger et al. 2013)   |
| cg21913886 | 1          | <i>TMEM51</i>   | NA <sup>b</sup> | 0.99           | (Zeilinger et al. 2013)   |

| <b>CpG</b> | <b>CHR</b> | <b>Gene</b>     | <b>27K: P</b>   | <b>450K: P</b> | <b>Source<sup>a</sup></b> |
|------------|------------|-----------------|-----------------|----------------|---------------------------|
| cg23079012 | 2          | NA <sup>c</sup> | NA <sup>b</sup> | 0.12           | (Zeilinger et al. 2013)   |
| cg27241845 | 2          | NA <sup>c</sup> | NA <sup>b</sup> | 2.61E-03       | (Zeilinger et al. 2013)   |
| cg03329539 | 2          | NA <sup>c</sup> | NA <sup>b</sup> | 1.03E-03       | (Zeilinger et al. 2013)   |
| cg13193840 | 2          | NA <sup>c</sup> | NA <sup>b</sup> | 0.02           | (Zeilinger et al. 2013)   |
| cg23667432 | 2          | <i>ALPP</i>     | 9.46E-07        | 0.22           | (Zeilinger et al. 2013)   |
| cg03188382 | 2          | <i>ALPP</i>     | NA <sup>b</sup> | 0.18           | (Zeilinger et al. 2013)   |
| cg19713851 | 2          | <i>ALPP</i>     | NA <sup>b</sup> | 0.06           | (Zeilinger et al. 2013)   |
| cg06635952 | 2          | <i>ANXA4</i>    | NA <sup>b</sup> | 0.19           | (Zeilinger et al. 2013)   |
| cg26271591 | 2          | <i>NFE2L2</i>   | NA <sup>b</sup> | 0.25           | (Zeilinger et al. 2013)   |
| cg15693572 | 3          | NA <sup>c</sup> | NA <sup>b</sup> | 7.90E-03       | (Zeilinger et al. 2013)   |
| cg23480021 | 3          | NA <sup>c</sup> | NA <sup>b</sup> | 1.51E-03       | (Zeilinger et al. 2013)   |
| cg03274391 | 3          | NA <sup>c</sup> | NA <sup>b</sup> | 7.49E-04       | (Zeilinger et al. 2013)   |
| cg15417641 | 3          | <i>CACNAID</i>  | NA <sup>b</sup> | 0.00118        | (Zeilinger et al. 2013)   |
| cg00336149 | 3          | <i>CACNAID</i>  | NA <sup>b</sup> | 6.37E-03       | (Zeilinger et al. 2013)   |
| cg21188533 | 3          | <i>CACNAID</i>  | NA <sup>b</sup> | 2.25E-03       | (Zeilinger et al. 2013)   |
| cg25197194 | 3          | <i>CCDC48</i>   | NA <sup>b</sup> | 0.02           | (Zeilinger et al. 2013)   |
| cg02657160 | 3          | <i>CPOX</i>     | NA <sup>b</sup> | 7.28E-07       | (Zeilinger et al. 2013)   |
| cg00501876 | 3          | <i>CSRNP1</i>   | NA <sup>b</sup> | 0.05           | (Zeilinger et al. 2013)   |
| cg18642234 | 3          | <i>GPXI</i>     | NA <sup>b</sup> | 0.18           | (Zeilinger et al. 2013)   |
| cg08202836 | 3          | <i>LRRC33</i>   | NA <sup>b</sup> | 5.53E-01       | (Zeilinger et al. 2013)   |
| cg17024919 | 3          | <i>ZNF385D</i>  | NA <sup>b</sup> | 0.07           | (Zeilinger et al. 2013)   |
| cg19719391 | 4          | NA <sup>c</sup> | NA <sup>b</sup> | 0.89           | (Zeilinger et al. 2013)   |
| cg24556382 | 4          | <i>GALNT7</i>   | NA <sup>b</sup> | 0.21           | (Zeilinger et al. 2013)   |

| <b>CpG</b> | <b>CHR</b> | <b>Gene</b>     | <b>27K: P</b>   | <b>450K: P</b> | <b>Source<sup>a</sup></b> |
|------------|------------|-----------------|-----------------|----------------|---------------------------|
| cg21121843 | 4          | <i>HTT</i>      | NA <sup>b</sup> | 0.74           | (Zeilinger et al. 2013)   |
| cg12513616 | 5          | NA <sup>c</sup> | NA <sup>b</sup> | 1.39E-03       | (Zeilinger et al. 2013)   |
| cg26703534 | 5          | <i>AHRR</i>     | NA <sup>b</sup> | 0.13           | (Zeilinger et al. 2013)   |
| cg25648203 | 5          | <i>AHRR</i>     | NA <sup>b</sup> | 0.05           | (Zeilinger et al. 2013)   |
| cg24090911 | 5          | <i>AHRR</i>     | NA <sup>b</sup> | 0.03           | (Zeilinger et al. 2013)   |
| cg23916896 | 5          | <i>AHRR</i>     | NA <sup>b</sup> | 0.02           | (Zeilinger et al. 2013)   |
| cg17924476 | 5          | <i>AHRR</i>     | NA <sup>b</sup> | 0.04           | (Zeilinger et al. 2013)   |
| cg14817490 | 5          | <i>AHRR</i>     | NA <sup>b</sup> | 0.62           | (Zeilinger et al. 2013)   |
| cg12806681 | 5          | <i>AHRR</i>     | NA <sup>b</sup> | 7.20E-03       | (Zeilinger et al. 2013)   |
| cg11902777 | 5          | <i>AHRR</i>     | NA <sup>b</sup> | 0.01           | (Zeilinger et al. 2013)   |
| cg11554391 | 5          | <i>AHRR</i>     | NA <sup>b</sup> | 2.77E-04       | (Zeilinger et al. 2013)   |
| cg08606254 | 5          | <i>AHRR</i>     | NA <sup>b</sup> | 0.03           | (Zeilinger et al. 2013)   |
| cg03991871 | 5          | <i>AHRR</i>     | NA <sup>b</sup> | 5.35E-05       | (Zeilinger et al. 2013)   |
| cg03604011 | 5          | <i>AHRR</i>     | NA <sup>b</sup> | 0.04           | (Zeilinger et al. 2013)   |
| cg01899089 | 5          | <i>AHRR</i>     | NA <sup>b</sup> | 2.80E-03       | (Zeilinger et al. 2013)   |
| cg01097768 | 5          | <i>AHRR</i>     | NA <sup>b</sup> | 0.03           | (Zeilinger et al. 2013)   |
| cg14580211 | 5          | <i>C5orf62</i>  | NA <sup>b</sup> | 7.49E-04       | (Zeilinger et al. 2013)   |
| cg13039251 | 5          | <i>PDZD2</i>    | NA <sup>b</sup> | 0.29           | (Zeilinger et al. 2013)   |
| cg05673882 | 5          | <i>POLK</i>     | NA <sup>b</sup> | 3.46E-03       | (Zeilinger et al. 2013)   |
| cg16786458 | 5          | <i>PPARGC1B</i> | 2.52E-03        | 0.21           | (Zeilinger et al. 2013)   |
| cg26908328 | 5          | <i>SERINC5</i>  | NA <sup>b</sup> | 0.72           | (Zeilinger et al. 2013)   |
| cg24859433 | 6          | NA <sup>c</sup> | NA <sup>b</sup> | 0.000061       | (Zeilinger et al. 2013)   |
| cg15342087 | 6          | NA <sup>c</sup> | NA <sup>b</sup> | 0.09           | (Zeilinger et al. 2013)   |

| <b>CpG</b> | <b>CHR</b> | <b>Gene</b>     | <b>27K: P</b>   | <b>450K: P</b> | <b>Source<sup>a</sup></b> |
|------------|------------|-----------------|-----------------|----------------|---------------------------|
| cg14753356 | 6          | NA <sup>c</sup> | NA <sup>b</sup> | 0.03           | (Zeilinger et al. 2013)   |
| cg01882991 | 6          | NA <sup>c</sup> | NA <sup>b</sup> | 0.02           | (Zeilinger et al. 2013)   |
| cg15474579 | 6          | <i>CDKN1A</i>   | NA <sup>b</sup> | 0.06           | (Zeilinger et al. 2013)   |
| cg00931843 | 6          | <i>TIAM2</i>    | NA <sup>b</sup> | 0.04           | (Zeilinger et al. 2013)   |
| cg17619755 | 6          | <i>VARS</i>     | NA <sup>b</sup> | 3.27E-03       | (Zeilinger et al. 2013)   |
| cg10807309 | 6          | <i>VARS</i>     | NA <sup>b</sup> | 0.38           | (Zeilinger et al. 2013)   |
| cg03440944 | 7          | <i>C7orf40</i>  | NA <sup>b</sup> | 0.13           | (Zeilinger et al. 2013)   |
| cg08972170 | 7          | <i>C7orf41</i>  | NA <sup>b</sup> | 0.2            | (Zeilinger et al. 2013)   |
| cg25949550 | 7          | <i>CNTNAP2</i>  | NA <sup>b</sup> | 1.12E-03       | (Zeilinger et al. 2013)   |
| cg21322436 | 7          | <i>CNTNAP2</i>  | NA <sup>b</sup> | 2.26E-03       | (Zeilinger et al. 2013)   |
| cg17372101 | 7          | <i>CNTNAP2</i>  | NA <sup>b</sup> | 0.03           | (Zeilinger et al. 2013)   |
| cg11207515 | 7          | <i>CNTNAP2</i>  | NA <sup>b</sup> | 0.08           | (Zeilinger et al. 2013)   |
| cg19717773 | 7          | <i>GNAI2</i>    | NA <sup>b</sup> | 0.32           | (Zeilinger et al. 2013)   |
| cg00921574 | 7          | <i>INTS1</i>    | NA <sup>b</sup> | 0.69           | (Zeilinger et al. 2013)   |
| cg02451831 | 7          | <i>KIAA0087</i> | NA <sup>b</sup> | 0.19           | (Zeilinger et al. 2013)   |
| cg22132788 | 7          | <i>MYO1G</i>    | NA <sup>b</sup> | 0.01           | (Zeilinger et al. 2013)   |
| cg19089201 | 7          | <i>MYO1G</i>    | NA <sup>b</sup> | 0.01           | (Zeilinger et al. 2013)   |
| cg12803068 | 7          | <i>MYO1G</i>    | NA <sup>b</sup> | 1.02E-03       | (Zeilinger et al. 2013)   |
| cg07826859 | 7          | <i>MYO1G</i>    | NA <sup>b</sup> | 0.13           | (Zeilinger et al. 2013)   |
| cg04180046 | 7          | <i>MYO1G</i>    | NA <sup>b</sup> | 0.02           | (Zeilinger et al. 2013)   |
| cg25305703 | 8          | NA <sup>c</sup> | NA <sup>b</sup> | 0.21           | (Zeilinger et al. 2013)   |
| cg24540678 | 8          | NA <sup>c</sup> | NA <sup>b</sup> | 0.02           | (Zeilinger et al. 2013)   |
| cg19589396 | 8          | NA <sup>c</sup> | NA <sup>b</sup> | 7.72E-03       | (Zeilinger et al. 2013)   |

| <b>CpG</b> | <b>CHR</b> | <b>Gene</b>     | <b>27K: P</b>   | <b>450K: P</b> | <b>Source<sup>a</sup></b> |
|------------|------------|-----------------|-----------------|----------------|---------------------------|
| cg13518625 | 8          | NA <sup>c</sup> | NA <sup>b</sup> | 0.25           | (Zeilinger et al. 2013)   |
| cg12075928 | 8          | <i>PTK2</i>     | NA <sup>b</sup> | 8.13E-03       | (Zeilinger et al. 2013)   |
| cg12276019 | 8          | <i>XKR6</i>     | NA <sup>b</sup> | 0.49           | (Zeilinger et al. 2013)   |
| cg26361535 | 8          | <i>ZC3H3</i>    | NA <sup>b</sup> | 0.04           | (Zeilinger et al. 2013)   |
| cg13787850 | 9          | NA <sup>c</sup> | NA <sup>b</sup> | 0.2            | (Zeilinger et al. 2013)   |
| cg01692968 | 9          | NA <sup>c</sup> | NA <sup>b</sup> | 1.61E-05       | (Zeilinger et al. 2013)   |
| cg13910681 | 9          | <i>FAM102A</i>  | NA <sup>b</sup> | 0.83           | (Zeilinger et al. 2013)   |
| cg22539182 | 10         | NA <sup>c</sup> | NA <sup>b</sup> | 0.1            | (Zeilinger et al. 2013)   |
| cg25953130 | 10         | <i>ARID5B</i>   | NA <sup>b</sup> | 0.13           | (Zeilinger et al. 2013)   |
| cg27312979 | 10         | <i>SORBS1</i>   | NA <sup>b</sup> | 0.3            | (Zeilinger et al. 2013)   |
| cg25421530 | 10         | <i>SORBS1</i>   | NA <sup>b</sup> | 0.73           | (Zeilinger et al. 2013)   |
| cg16611234 | 11         | NA <sup>c</sup> | NA <sup>b</sup> | 0.2            | (Zeilinger et al. 2013)   |
| cg03234777 | 11         | <i>AMICA1</i>   | NA <sup>b</sup> | 0.14           | (Zeilinger et al. 2013)   |
| cg01901332 | 11         | <i>ARRB1</i>    | NA <sup>b</sup> | 0.02           | (Zeilinger et al. 2013)   |
| cg19254163 | 11         | <i>GPR44</i>    | NA <sup>b</sup> | 0.07           | (Zeilinger et al. 2013)   |
| cg26963277 | 11         | <i>KCNQ1OT1</i> | NA <sup>b</sup> | 0.08           | (Zeilinger et al. 2013)   |
| cg16556677 | 11         | <i>KCNQ1OT1</i> | NA <sup>b</sup> | 0.78           | (Zeilinger et al. 2013)   |
| cg07123182 | 11         | <i>KCNQ1OT1</i> | NA <sup>b</sup> | 0.19           | (Zeilinger et al. 2013)   |
| cg01744331 | 11         | <i>KCNQ1OT1</i> | NA <sup>b</sup> | 0.15           | (Zeilinger et al. 2013)   |
| cg21611682 | 11         | <i>LRP5</i>     | NA <sup>b</sup> | 6.10E-04       | (Zeilinger et al. 2013)   |
| cg14624207 | 11         | <i>LRP5</i>     | NA <sup>b</sup> | 0.18           | (Zeilinger et al. 2013)   |
| cg04039799 | 11         | <i>NAV2</i>     | NA <sup>b</sup> | 0.13           | (Zeilinger et al. 2013)   |
| cg23771366 | 11         | <i>PRSS23</i>   | NA <sup>b</sup> | 1.16E-03       | (Zeilinger et al. 2013)   |

| <b>CpG</b> | <b>CHR</b> | <b>Gene</b>     | <b>27K: P</b>   | <b>450K: P</b> | <b>Source<sup>a</sup></b> |
|------------|------------|-----------------|-----------------|----------------|---------------------------|
| cg11660018 | 11         | <i>PRSS23</i>   | NA <sup>b</sup> | 0.01           | (Zeilinger et al. 2013)   |
| cg09197783 | 11         | <i>SLC43A3</i>  | NA <sup>b</sup> | 0.1            | (Zeilinger et al. 2013)   |
| cg02583484 | 12         | <i>HNRNPA1</i>  | NA <sup>b</sup> | 0.48           | (Zeilinger et al. 2013)   |
| cg04158018 | 12         | <i>NFE2</i>     | NA <sup>b</sup> | 0.32           | (Zeilinger et al. 2013)   |
| cg26282236 | 12         | <i>RAD52</i>    | NA <sup>b</sup> | 0.63           | (Zeilinger et al. 2013)   |
| cg23681440 | 13         | NA <sup>c</sup> | NA <sup>b</sup> | 0.31           | (Zeilinger et al. 2013)   |
| cg06885459 | 13         | <i>MCF2L</i>    | NA <sup>b</sup> | 0.13           | (Zeilinger et al. 2013)   |
| cg25491122 | 13         | <i>PCDH9</i>    | NA <sup>b</sup> | 0.45           | (Zeilinger et al. 2013)   |
| cg23126342 | 13         | <i>PCDH9</i>    | NA <sup>b</sup> | 0.53           | (Zeilinger et al. 2013)   |
| cg17487894 | 13         | <i>RASA3</i>    | NA <sup>b</sup> | 0.26           | (Zeilinger et al. 2013)   |
| cg13038618 | 14         | NA <sup>c</sup> | NA <sup>b</sup> | 0.13           | (Zeilinger et al. 2013)   |
| cg01208318 | 14         | NA <sup>c</sup> | NA <sup>b</sup> | 0.33           | (Zeilinger et al. 2013)   |
| cg24996979 | 14         | <i>C14orf43</i> | NA <sup>b</sup> | 0.19           | (Zeilinger et al. 2013)   |
| cg22851561 | 14         | <i>C14orf43</i> | NA <sup>b</sup> | 9.52E-03       | (Zeilinger et al. 2013)   |
| cg13976502 | 14         | <i>C14orf43</i> | NA <sup>b</sup> | 0.08           | (Zeilinger et al. 2013)   |
| cg10919522 | 14         | <i>C14orf43</i> | NA <sup>b</sup> | 0.13           | (Zeilinger et al. 2013)   |
| cg01731783 | 14         | <i>C14orf43</i> | NA <sup>b</sup> | 0.1            | (Zeilinger et al. 2013)   |
| cg05875421 | 14         | <i>GPR68</i>    | NA <sup>b</sup> | 0.3            | (Zeilinger et al. 2013)   |
| cg11730703 | 14         | <i>INF2</i>     | NA <sup>b</sup> | 0.56           | (Zeilinger et al. 2013)   |
| cg05284742 | 14         | <i>ITPK1</i>    | NA <sup>b</sup> | 0.09           | (Zeilinger et al. 2013)   |
| cg06819357 | 14         | <i>TECPR2</i>   | NA <sup>b</sup> | 0.09           | (Zeilinger et al. 2013)   |
| cg26242531 | 14         | <i>ZFYVE21</i>  | NA <sup>b</sup> | 0.02           | (Zeilinger et al. 2013)   |
| cg05194346 | 15         | NA <sup>c</sup> | NA <sup>b</sup> | 0.24           | (Zeilinger et al. 2013)   |



| <b>CpG</b> | <b>CHR</b> | <b>Gene</b>         | <b>27K: P</b>   | <b>450K: P</b> | <b>Source<sup>a</sup></b> |
|------------|------------|---------------------|-----------------|----------------|---------------------------|
| cg23161492 | 15         | <i>ANPEP</i>        | NA <sup>b</sup> | 2.71E-03       | (Zeilinger et al. 2013)   |
| cg11152412 | 15         | <i>EDC3</i>         | NA <sup>b</sup> | 0.25           | (Zeilinger et al. 2013)   |
| cg03489965 | 15         | <i>LOC390594</i>    | NA <sup>b</sup> | 0.07           | (Zeilinger et al. 2013)   |
| cg18335991 | 15         | <i>SEMA7A</i>       | NA <sup>b</sup> | 0.05           | (Zeilinger et al. 2013)   |
| cg00310412 | 15         | <i>SEMA7A</i>       | NA <sup>b</sup> | 0.26           | (Zeilinger et al. 2013)   |
| cg15022400 | 15         | <i>TRIM69</i>       | NA <sup>b</sup> | 0.83           | (Zeilinger et al. 2013)   |
| cg03155159 | 16         | NA <sup>c</sup>     | NA <sup>b</sup> | 0.45           | (Zeilinger et al. 2013)   |
| cg01207684 | 16         | <i>ADCY9</i>        | NA <sup>b</sup> | 0.04           | (Zeilinger et al. 2013)   |
| cg09099830 | 16         | <i>ITGAL</i>        | NA <sup>b</sup> | 0.09           | (Zeilinger et al. 2013)   |
| cg02186444 | 17         | <i>ARMC7</i>        | NA <sup>b</sup> | 0.74           | (Zeilinger et al. 2013)   |
| cg16255816 | 17         | <i>HAPI</i>         | NA <sup>b</sup> | 0.06           | (Zeilinger et al. 2013)   |
| cg03373393 | 17         | <i>HAPI</i>         | NA <sup>b</sup> | 0.61           | (Zeilinger et al. 2013)   |
| cg23621097 | 17         | <i>HIC1</i>         | NA <sup>b</sup> | 0.37           | (Zeilinger et al. 2013)   |
| cg00911794 | 17         | <i>HIC1</i>         | NA <sup>b</sup> | 0.24           | (Zeilinger et al. 2013)   |
| cg25809905 | 17         | <i>ITGA2B</i>       | 3.42E-05        | 0.77           | (Zeilinger et al. 2013)   |
| cg07251887 | 17         | <i>LOC100130933</i> | NA <sup>b</sup> | 0.02           | (Zeilinger et al. 2013)   |
| cg21280392 | 17         | <i>PHOSPHO1</i>     | NA <sup>b</sup> | 0.32           | (Zeilinger et al. 2013)   |
| cg19572487 | 17         | <i>RARA</i>         | NA <sup>b</sup> | 5.95E-04       | (Zeilinger et al. 2013)   |
| cg09858022 | 17         | <i>RARA</i>         | NA <sup>b</sup> | 0.02           | (Zeilinger et al. 2013)   |
| cg04956244 | 17         | <i>RARA</i>         | NA <sup>b</sup> | 0.05           | (Zeilinger et al. 2013)   |
| cg07465627 | 17         | <i>STXBP4</i>       | NA <sup>b</sup> | 0.58           | (Zeilinger et al. 2013)   |
| cg06459104 | 18         | <i>EPB41L3</i>      | NA <sup>b</sup> | 0.11           | (Zeilinger et al. 2013)   |
| cg00073090 | 19         | NA <sup>c</sup>     | NA <sup>b</sup> | 0.26           | (Zeilinger et al. 2013)   |

| <b>CpG</b> | <b>CHR</b> | <b>Gene</b>       | <b>27K: P</b>   | <b>450K: P</b> | <b>Source<sup>a</sup></b> |
|------------|------------|-------------------|-----------------|----------------|---------------------------|
| cg15159987 | 19         | <i>CPAMD8</i>     | NA <sup>b</sup> | 0.09           | (Zeilinger et al. 2013)   |
| cg23973524 | 19         | <i>CRTC1</i>      | NA <sup>b</sup> | 0.03           | (Zeilinger et al. 2013)   |
| cg22649124 | 19         | <i>LGALS7B</i>    | NA <sup>b</sup> | 0.75           | (Zeilinger et al. 2013)   |
| cg00835193 | 19         | <i>LINGO3</i>     | NA <sup>b</sup> | 0.48           | (Zeilinger et al. 2013)   |
| cg11902728 | 19         | <i>MAG</i>        | NA <sup>b</sup> | 0.23           | (Zeilinger et al. 2013)   |
| cg15187398 | 19         | <i>MOBKL2A</i>    | NA <sup>b</sup> | 0.28           | (Zeilinger et al. 2013)   |
| cg07381806 | 19         | <i>MOBKL2A</i>    | NA <sup>b</sup> | 0.02           | (Zeilinger et al. 2013)   |
| cg11701312 | 19         | <i>RPS5</i>       | NA <sup>b</sup> | 0.4            | (Zeilinger et al. 2013)   |
| cg16201146 | 20         | NA <sup>c</sup>   | NA <sup>b</sup> | 0.42           | (Zeilinger et al. 2013)   |
| cg07339236 | 20         | <i>ATP9A</i>      | NA <sup>b</sup> | 0.02           | (Zeilinger et al. 2013)   |
| cg22635096 | 21         | <i>ADARB1</i>     | NA <sup>b</sup> | 0.06           | (Zeilinger et al. 2013)   |
| cg23110422 | 21         | <i>ETS2</i>       | NA <sup>b</sup> | 0.02           | (Zeilinger et al. 2013)   |
| cg00871610 | 21         | <i>MIR802</i>     | NA <sup>b</sup> | 7.96E-03       | (Zeilinger et al. 2013)   |
| cg06595162 | 21         | <i>NCRNA00114</i> | NA <sup>b</sup> | 0.28           | (Zeilinger et al. 2013)   |
| cg01127300 | 22         | NA <sup>c</sup>   | NA <sup>b</sup> | 0.06           | (Zeilinger et al. 2013)   |
| cg02532700 | 22         | <i>NCF4</i>       | NA <sup>b</sup> | 0.95           | (Zeilinger et al. 2013)   |

<sup>a</sup>Refers to previous publications where the CpG has been reported. <sup>b</sup>Not included on the 27K array. <sup>c</sup>No Known gene.

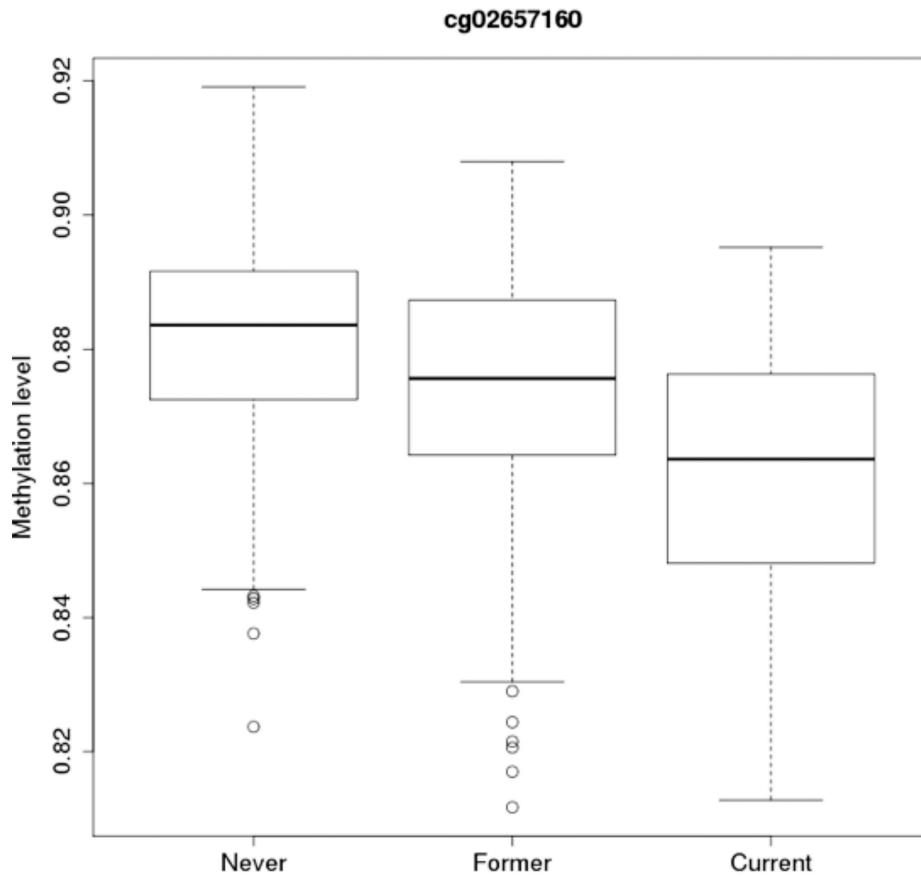

**Figure S1.** Replication of cg02657160 (*CPOX*) using pyrosequencing. A two-way ANOVA test comparing never / former smokers ( $P=7.56\times 10^{-4}$ ) and never / current smokers ( $P=2.77\times 10^{-14}$ ) showed significantly decreased methylation in the groups exposed to smoking. Shown are the highest methylation datum within 1.5 inter-quantile-range (IQR) of the upper quartile, upper quartile, median, lower quartile, and the lowest methylation datum within 1.5 IQR of the lower quartile. Methylation data outside of 1.5 IQR from lower or upper quartile are plotted as open circles.

## References

- Breitling LP, Yang R, Korn B, Burwinkel B, Brenner H. 2011. Tobacco-smoking-related differential DNA methylation: 27K discovery and replication. *Am J Hum Genet* 88: 450-457.
- NIEHS (National Institute of Environmental Health Sciences) 2014. The Sister Study Cohort Description. Available: <http://sisterstudy.niehs.nih.gov> [accessed 19 March 2014].
- Shenker NS, Polidoro S, van Veldhoven K, Sacerdote C, Ricceri F, Birrell MA, et al. 2013. Epigenome-wide association study in the european prospective investigation into cancer and nutrition (EPIC-Turin) identifies novel genetic loci associated with smoking. *Hum Mol Genet* 22:843-851.
- Sun Y, Smith A, Conneely K, Chang Q, Li W, Lazarus A, et al. 2013. Epigenomic association analysis identifies smoking-related DNA methylation sites in African Americans. *Hum Genet* 132:1027-1037
- Wan ES, Qiu W, Baccarelli A, Carey VJ, Bacherman H, Rennard SI, et al. 2012. Cigarette smoking behaviors and time since quitting are associated with differential DNA methylation across the human genome. *Hum Mol Genet* 21: 3073-3082.
- Zeilinger S, Kühnel B, Klopp N, Baurecht H, Kleinschmidt A, Gieger C, et al. 2013. Tobacco smoking leads to extensive genome-wide changes in DNA methylation. *PloS one* 8:1-14.
